# Supplementary material for: Dental plaque development on a hydroxyapatite disk in young adults observed by using a barcoded pyrosequencing approach
Source: PubMed Central journal article supplement — Sci Rep. 2015 Jan 30;5:8136. doi: 10.1038/srep08136 (PMC4311255; doi:10.1038/srep08136), 2015-01-30
Supplement: srep08136-s1.pdf [file srep08136-s1.pdf]

# Dental plaque development on a hydroxyapatite disk in young adults observed by using a barcoded pyrosequencing approach.

Toru Takeshita<sup>1</sup>, Masaki Yasui<sup>1</sup>, Yukie Shibata<sup>1</sup>, Michiko Furuta<sup>1</sup>, Yoji Saeki<sup>2</sup>, Nobuoki Eshima<sup>3</sup>, Yoshihisa Yamashita<sup>1\*</sup>

<sup>1</sup>Section of Preventive and Public Health Dentistry, Division of Oral Health, Growth and Development, Kyushu University Faculty of Dental Science, Fukuoka, Japan,

<sup>2</sup>Oral Science Section, Central Laboratory, Lotte Co., Ltd., Saitama, Japan,

<sup>3</sup>Department of Biostatistics, Oita University Faculty of Medicine, Yufu City, Oita, Japan.

Correspondence and requests for materials should be addressed to Y.Y.

Table S1. Number of sequence reads that passed quality filtering.

| Subject | Dental plaque |             |             |             |             |             | Saliva      |
|---------|---------------|-------------|-------------|-------------|-------------|-------------|-------------|
|         | Day 1         | Day 2       | Day 3       | Day 4       | Day 5       | Day 7       |             |
| E1      | 2478 (98.4)   | 2012 (98.0) | 2478 (98.1) | 2251 (96.9) | 2619 (96.3) | 5637 (95.5) | 7904 (96.1) |
| E2      | 1817 (96.3)   | 1910 (97.0) | 2519 (97.3) | 2438 (96.7) | 2567 (96.7) | 4988 (95.0) | 5248 (95.2) |
| E3      | 2132 (97.3)   | 1277 (97.8) | 4377 (98.6) | 3335 (98.0) | 3278 (98.1) | 6888 (95.7) | 6345 (95.2) |
| E4      | 3134 (99.0)   | 2333 (97.9) | 3507 (98.6) | 2791 (98.1) | 2107 (96.5) | 6211 (95.9) | 5845 (96.4) |
| E5      | 1917 (98.6)   | 1050 (97.1) | 2807 (97.1) | 2420 (97.2) | 1156 (95.8) | 5670 (95.2) | 5459 (95.3) |
| E6      | 2177 (97.7)   | 2166 (97.3) | 3366 (97.7) | 4045 (97.6) | 2851 (97.4) | 6310 (95.9) | 4768 (93.1) |
| E7      | 1373 (96.3)   | 1811 (96.0) | 2486 (96.9) | 3295 (96.6) | 2164 (96.3) | 6939 (96.0) | 5430 (94.9) |
| E8      | 2394 (98.2)   | 1779 (97.4) | 4209 (98.4) | 2206 (97.4) | 2337 (97.2) | 6943 (95.8) | 5136 (93.6) |
| E9      | 2602 (98.7)   | 2664 (98.7) | 4395 (99.4) | 3925 (99.2) | 2995 (98.4) | 6754 (96.8) | 5548 (95.8) |
| E10     | 2625 (97.9)   | 2325 (97.5) | 4000 (98.2) | 2760 (98.0) | 4668 (97.9) | 5789 (96.2) | 5034 (93.8) |
| F1      | 1321 (96.7)   | 2664 (97.9) | 1239 (96.4) | 2870 (97.5) | 2386 (96.7) | 6485 (95.7) | 5040 (94.4) |
| F2      | 2307 (98.5)   | 1942 (97.8) | 2030 (97.7) | 4442 (98.4) | 1763 (96.5) | 5480 (95.7) | 6340 (94.8) |
| F3      | 2424 (97.6)   | 3093 (98.2) | 1788 (97.3) | 3846 (98.2) | 2048 (97.9) | 6370 (96.5) | 6291 (95.4) |
| F4      | 2222 (98.1)   | 1632 (97.2) | 822 (94.9)  | 2531 (97.5) | 2300 (96.2) | 5573 (95.4) | 5300 (94.6) |
| F5      | 1681 (96.8)   | 2263 (96.2) | 1002 (95.3) | 4436 (97.5) | 1251 (96.5) | 6685 (96.2) | 4319 (93.2) |
| F6      | 2007 (96.9)   | 2471 (97.9) | 2045 (96.5) | 3416 (97.9) | 3167 (97.2) | 5501 (95.0) | 5117 (94.2) |
| F7      | 2636 (98.1)   | 2496 (97.6) | 2171 (98.3) | 3992 (98.8) | 3857 (97.1) | 7130 (96.4) | 5036 (93.1) |
| F8      | 2551 (97.5)   | 2023 (98.2) | 2169 (97.4) | 4737 (98.3) | 4214 (97.9) | 6975 (96.2) | 6149 (94.9) |
| F9      | 1604 (96.1)   | 1374 (95.9) | 1194 (95.7) | 3873 (97.6) | 3630 (97.4) | 7794 (96.5) | 5734 (95.0) |

Good's coverage value (%) of each sample is shown in parenthesis.
